# Supplementary material for: Cobalamin reduction by dithionite. Evidence for the formation of a six-coordinate cobalamin(ii) complex
Source: Royal Society of Chemistry journal article supplement (doi:10.1039/c1dt10219b), 2011-01-01
Supplement: c1dt10219b.pdf [file c1dt10219b.pdf]

## SUPPORTING INFORMATION

### Cobalamin reduction with dithionite. Evidence for the formation of a six-coordinate Cbl(II) complex

Denis S. Salnikov, Radu Silaghi-Dumitrescu, Sergei V. Makarov, Rudi van Eldik and Gerry R. Boss

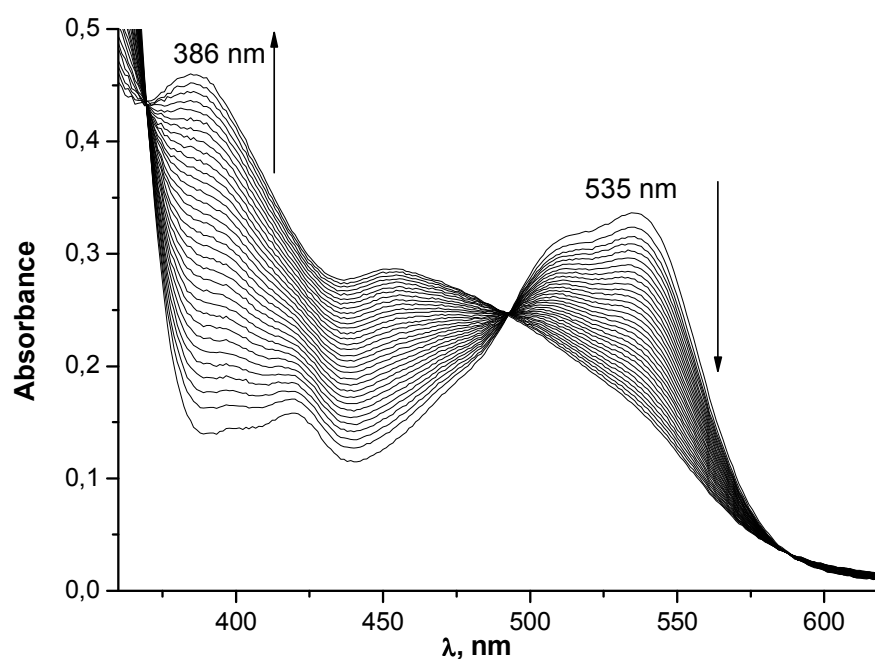

Figure S1. UV-Vis spectral changes registered during the reduction of OHCbl by sodium dithionite. Experimental conditions:  $[\text{OHCbl}]_0 = 3.4 \times 10^{-5} \text{ M}$ ;  $[\text{S}_2\text{O}_4^{2-}] = 2 \times 10^{-4} \text{ M}$ ;  $[\text{NaOH}] = 0.1 \text{ M}$ ; 298 K; anaerobic conditions. The spectra were recorded at 60 s intervals.

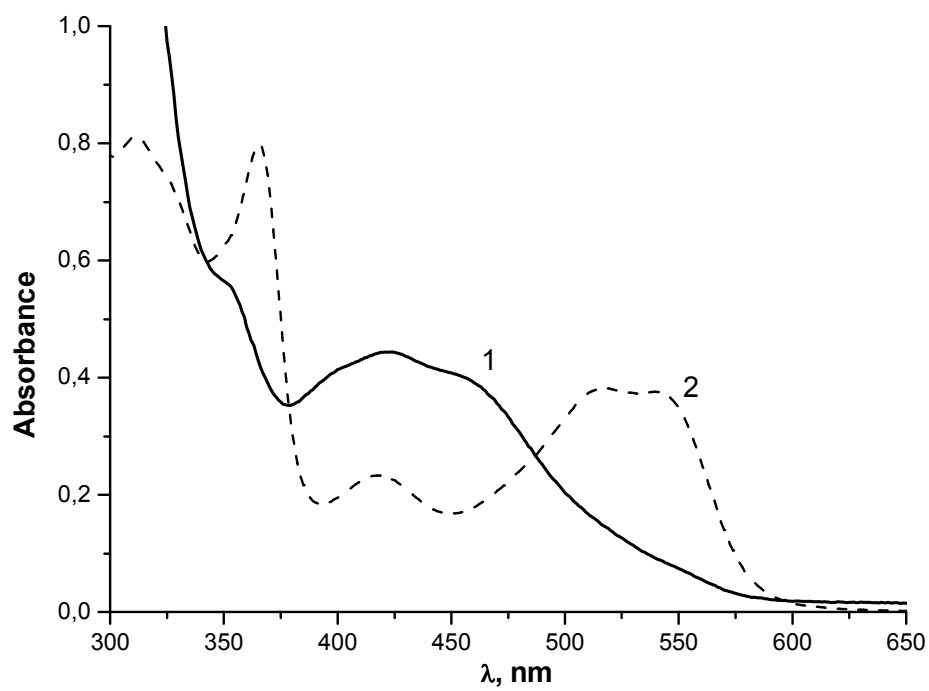

Figure S2. UV-vis spectrum of the system Cbl(III)-sulfite. Experimental conditions:  $[\text{OHCbl}]_0 = 5 \times 10^{-5} \text{ M}$ ;  $[\text{SO}_3^{2-}] = 0.1 \text{ M}$ ; pH = 0 (1), 2.8 (2); T = 298 K

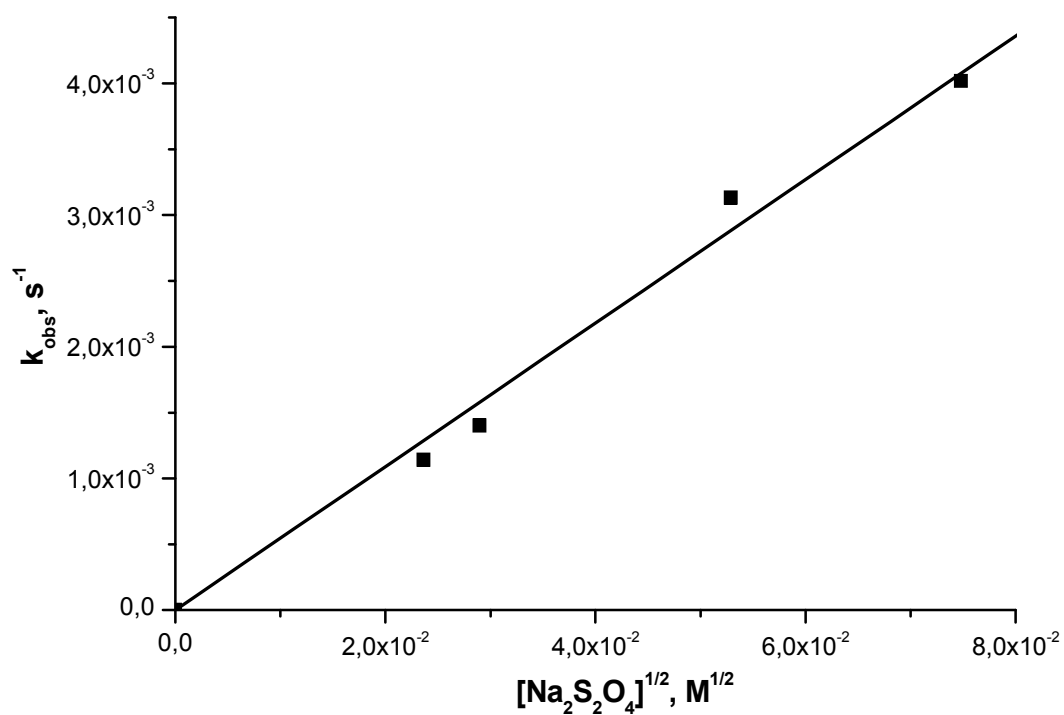

Figure S3. Plot of  $k_{\text{obs}}$  versus  $[\text{S}_2\text{O}_4^{2-}]^{1/2}$  for the reaction between Cbl(III) and sodium dithionite. Experimental conditions:  $[\text{OHCbl}]_0 = 5 \times 10^{-5}$ ;  $[\text{NaOH}] = 0.1 \text{ M}$ ; 298 K.

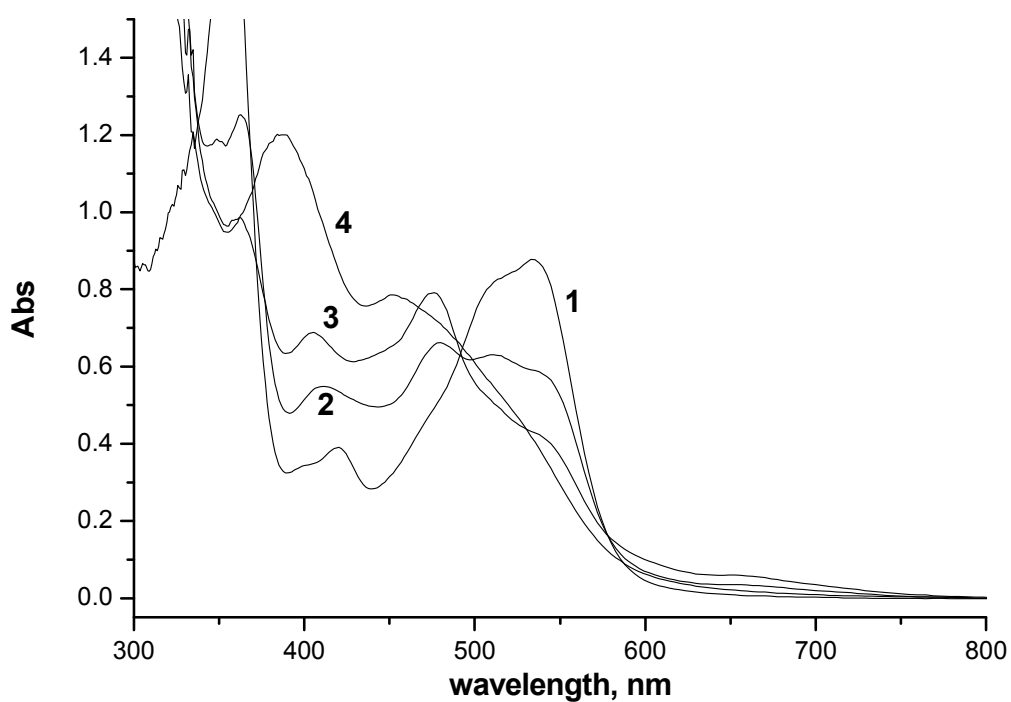

Figure S4. UV-Vis spectra of solutions containing different concentrations of dithionite; Experimental conditions:  $[\text{OHCbl}]_0 = 1 \times 10^{-4} \text{ M}$ ;  $[\text{S}_2\text{O}_4^{2-}] = 0$  (1),  $0.25 \times 10^{-4}$  (2),  $0.5 \times 10^{-4}$  (3),  $1.8 \times 10^{-4}$  (4) M; pH = 8.5; 298 K
